# Supplementary material for: Pan-Cancer Analysis of the Prognostic and Immunological Role of HSF1: A Potential Target for Survival and Immunotherapy
Source: Oxid Med Cell Longev. 2021 Jun 18;2021:5551036. doi: 10.1155/2021/5551036 (PMC8238600; doi:10.1155/2021/5551036)
Supplement: Supplementary Materials — Supplementary Figure 1: association between the HSF1 expression and PFI of cancer patients. (a) A forest plot of hazard ratios of HSF1 in 32 types of tumors. (b) Kaplan-Meier survival curves of PFI for patients stratified by the different expressions of HSF1 in ACC, PRAD, HNSC, and UCS. Supplementary Figure 2: association between the HSF1 expression and DFI in cancer patients. (a) A forest plot of hazard ratios of HSF1 in 28 types of tumors. (b) Kaplan-Meier survival curves of DFI for patients stratified by the different expressions of HSF1 in ACC and TGCT. Supplementary Figure 3: promoter methylation level of HSF1 in pan-cancer. The results were obtained from the UALCAN database. ∗p < 0.05, ∗∗p < 0.01, ∗∗∗p < 0.001, and ∗∗∗∗p < 0.0001. Supplementary Figure 4: the correlation between the HSF1 expression and the methylation level of HSF1 in pan-cancer. ∗p < 0.05, ∗∗p < 0.01, and ∗∗∗p < 0.001. Supplementary Figure 5: correlation analysis of the HSF1 expression with immunostimulatory genes in pan-cancer. ∗p < 0.05, ∗∗p < 0.01, ∗∗∗p < 0.001, and ∗∗∗∗p < 0.0001. Supplementary Figure 6: relationship between the HSF1 gene expression and MSI in pan-cancer. Correlation analysis was performed using Spearman's method. [file 5551036.f1.zip]

Archive with 7 entries (6 files):
- 5551036.f1/Supplementary Figure S1.eps
- 5551036.f1/Supplementary Figure S2.eps
- 5551036.f1/Supplementary Figure S4.eps
- 5551036.f1/Supplementary Figure S5.eps
- 5551036.f1/Supplementary Figure S6.eps
- 5551036.f1/
- 5551036.f1/Supplementary Figure S3.eps
